# Supplementary material for: A simple and efficient fluorophoric probe for dual sensing of Fe3+and F−: application to bioimaging in native cellular iron pools and live cells
Source: Royal Society of Chemistry journal article supplement (doi:10.1039/c4nj00239c), 2014-01-01
Supplement: c4nj00239c1.pdf [file c4nj00239c1.pdf]

### Supporting Information

# A simple and efficient Fluorophoric probe for dual sensing of $\text{Fe}^{3+}$ and $\text{F}^-$ : Application to bioimaging in native cellular iron pool and live cell

Chirantan Kar<sup>a</sup>, Soham Samanta<sup>a</sup>, Sandipan Mukherjee<sup>b</sup>, Barun K. Dutta<sup>a</sup>, Aiyagari

Ramesh<sup>\*b</sup> and Gopal Das<sup>\*a</sup>

<sup>a</sup> Department of Chemistry, Indian Institute of Technology Guwahati, Assam, 781 039, India.

<sup>b</sup> Department of Biotechnology, Indian Institute of Technology Guwahati, Assam, 781 039, India.

E-mail: gdas@iitg.ernet.in; aramesh@iitg.ernet.in

Fax: +91-361-258-2349; Tel: +91-361-258-2313

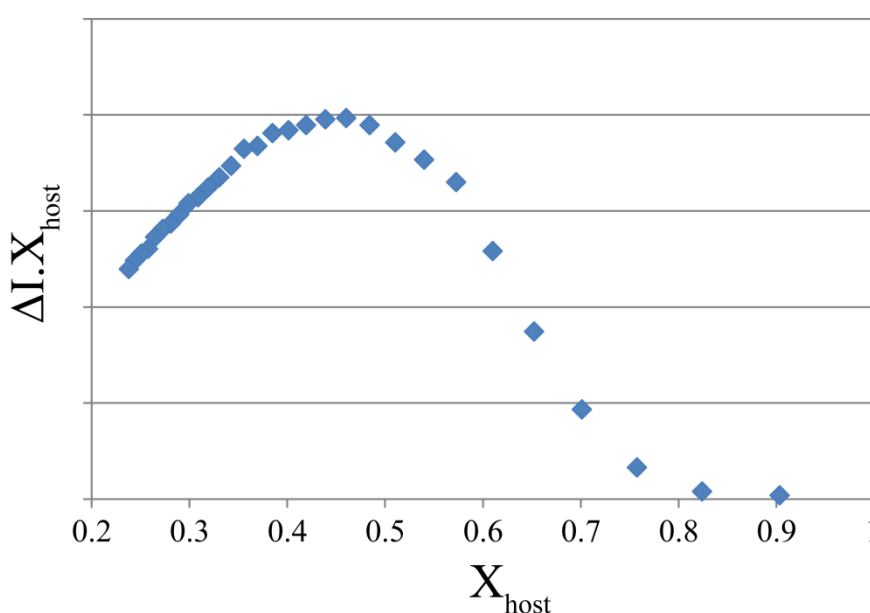

**Figure S1:** Job's plot between  $L_1$  and  $Fe^{3+}$  ions. Where  $X_{\text{host}}$  = the mole fraction of  $L_1$  and  $\Delta I$  is the change  $(I-I_0)$  in the intensity of the emission spectra in presence of guest.

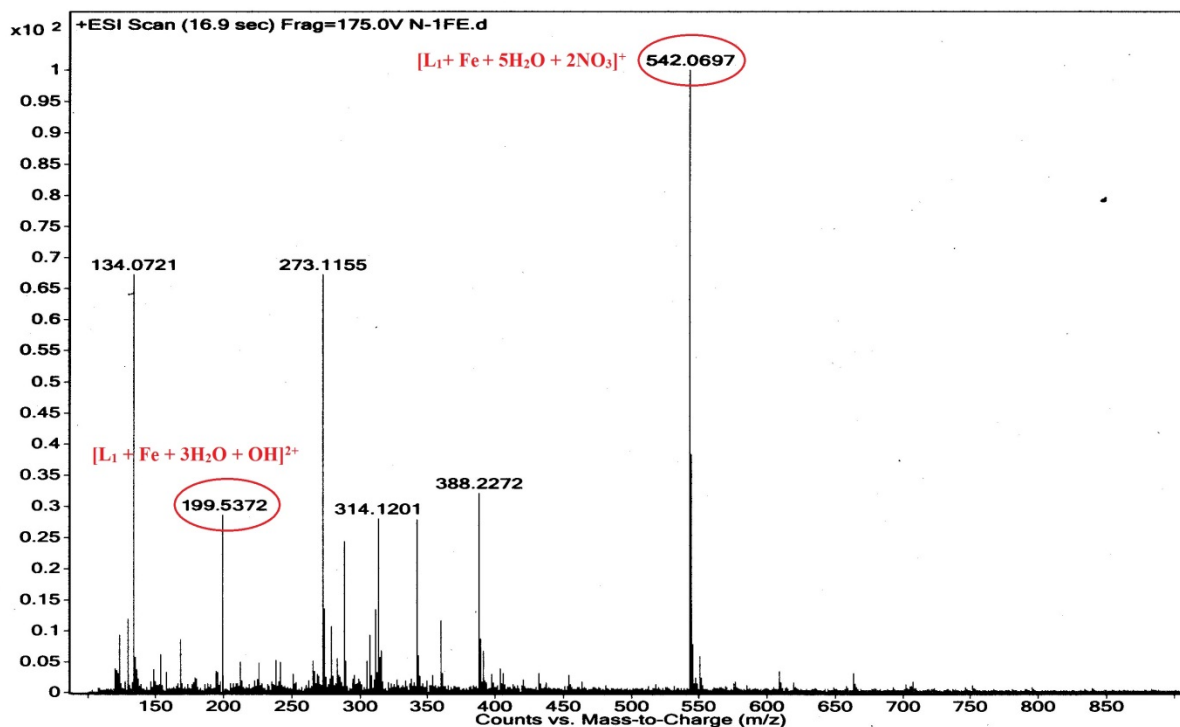

**Figure S2:** Mass spectrum of  $L_1$ -Fe complex.

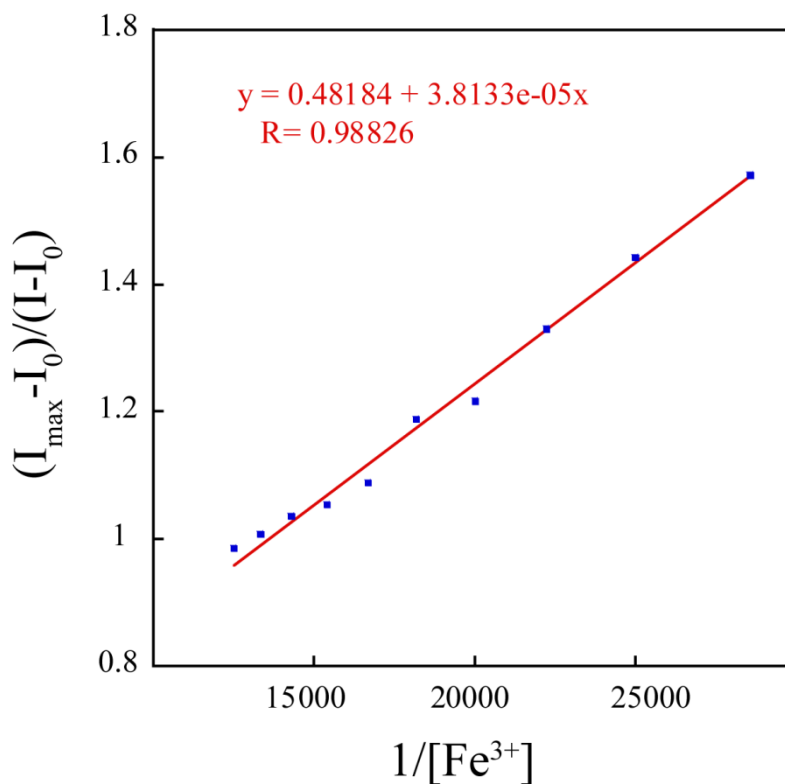

**Figure S3:** Bensei-Hildebrand plot obtained from the fluorescence emission (calculated at  $\lambda_{\text{em}}$ ) studies.

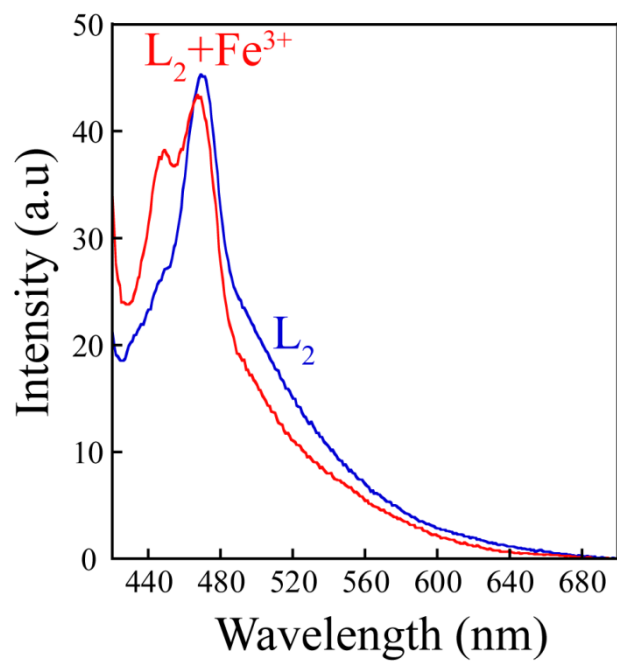

**Figure S4:** Changes of the of fluorescence emission of compound  $L_2$  ( $10 \mu\text{M}$ ) observed upon addition of 10 eqv. of  $Fe^{3+}$  ions.

| Occupied Orbitals                                                                            | Energy (eV) | Vacant Orbitals                                                                              | Energy (eV) |
|----------------------------------------------------------------------------------------------|-------------|----------------------------------------------------------------------------------------------|-------------|
| HOMO -2<br>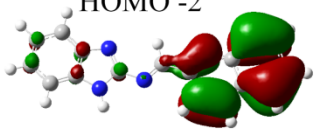 | -6.5079     | LUMO<br>   | -2.2675     |
| HOMO -1<br> | -6.1375     | LUMO+1<br> | -1.2215     |
| HOMO<br>    | -5.7351     | LUMO+2<br> | -0.1913     |

**Figure S5:** Selected orbitals and their energies for  $L_1$  at B3LYP/6-31G(d).

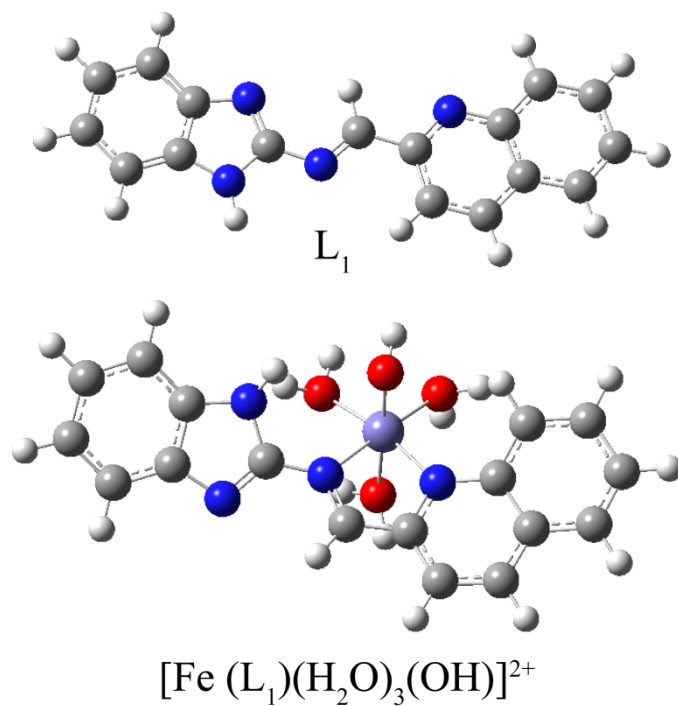

**Figure S6:** Optimized proposed structures of  $L_1$  and  $L_1$ -Fe complex

| Center | Atomic | Atomic | Coordinates (Angstroms) |          |          |
|--------|--------|--------|-------------------------|----------|----------|
| Number | Number | Type   | X                       | Y        | Z        |
| -----  |        |        |                         |          |          |
| 1      | 6      | 0      | -3.94656                | 0.720773 | -4.1E-05 |
| 2      | 6      | 0      | -4.26671                | -0.66523 | 0.000053 |
| 3      | 6      | 0      | -5.58285                | -1.13174 | 0.00014  |
| 4      | 6      | 0      | -6.5881                 | -0.16937 | 0.000128 |
| 5      | 6      | 0      | -6.29064                | 1.209949 | 0.000036 |
| 6      | 6      | 0      | -4.97959                | 1.669673 | -4.6E-05 |
| 7      | 6      | 0      | -2.0726                 | -0.3138  | -8.3E-05 |
| 8      | 1      | 0      | -5.81569                | -2.19214 | 0.000212 |
| 9      | 1      | 0      | -7.62619                | -0.48772 | 0.000194 |
| 10     | 1      | 0      | -7.10828                | 1.924401 | 0.000029 |
| 11     | 1      | 0      | -4.7455                 | 2.729038 | -0.00013 |
| 12     | 6      | 0      | 0.163272                | 0.188487 | -0.0001  |
| 13     | 1      | 0      | -0.06494                | 1.257634 | -0.00014 |
| 14     | 6      | 0      | 1.587802                | -0.16135 | -6.5E-05 |
| 15     | 6      | 0      | 2.016518                | -1.52101 | -7.5E-05 |
| 16     | 6      | 0      | 3.76025                 | 0.615636 | 0.000009 |
| 17     | 6      | 0      | 3.359969                | -1.78914 | -4.2E-05 |
| 18     | 1      | 0      | 1.267398                | -2.30379 | -0.00011 |
| 19     | 6      | 0      | 4.659107                | 1.716218 | 0.000063 |
| 20     | 6      | 0      | 4.290985                | -0.71599 | 0.000003 |
| 21     | 1      | 0      | 3.726522                | -2.8126  | -4.2E-05 |
| 22     | 6      | 0      | 6.018967                | 1.504142 | 0.000097 |
| 23     | 1      | 0      | 4.233042                | 2.713918 | 0.000069 |
| 24     | 6      | 0      | 5.696156                | -0.90023 | 0.000038 |
| 25     | 6      | 0      | 6.542237                | 0.187224 | 0.000083 |
| 26     | 1      | 0      | 6.70068                 | 2.349384 | 0.000132 |
| 27     | 1      | 0      | 6.094457                | -1.9115  | 0.000031 |
| 28     | 1      | 0      | 7.61787                 | 0.038469 | 0.000111 |
| 29     | 7      | 0      | 2.423765                | 0.87028  | -2.1E-05 |
| 30     | 7      | 0      | -0.75155                | -0.71853 | -9.6E-05 |
| 31     | 7      | 0      | -2.57876                | 0.904484 | -0.00013 |
| 32     | 7      | 0      | -3.04233                | -1.29691 | 0.000017 |
| 33     | 1      | 0      | -2.8465                 | -2.28576 | 0.000079 |
| -----  |        |        |                         |          |          |

Rotational constants (GHZ): 1.505329 0.101277 0.094893

**Figure S7:** Coordinates for optimized geometry of L<sub>1</sub> at B3LYP/6-31G(d,p).

| Center<br>Number | Atomic<br>Number | Atomic<br>Type | Coordinates (Angstroms) |          |          |
|------------------|------------------|----------------|-------------------------|----------|----------|
|                  |                  |                | X                       | Y        | Z        |
| -----            |                  |                |                         |          |          |
| 1                | 6                | 0              | -4.15873                | 0.96518  | 0.058624 |
| 2                | 6                | 0              | -4.04387                | -0.2774  | -0.62417 |
| 3                | 6                | 0              | -5.14743                | -0.95835 | -1.12573 |
| 4                | 6                | 0              | -6.38741                | -0.35979 | -0.90749 |
| 5                | 6                | 0              | -6.52185                | 0.864597 | -0.21098 |
| 6                | 6                | 0              | -5.41918                | 1.54183  | 0.284585 |
| 7                | 6                | 0              | -2.06922                | 0.548694 | -0.0468  |
| 8                | 1                | 0              | -5.06158                | -1.89875 | -1.65914 |
| 9                | 1                | 0              | -7.28006                | -0.85098 | -1.28042 |
| 10               | 1                | 0              | -7.51399                | 1.279179 | -0.06941 |
| 11               | 1                | 0              | -5.50995                | 2.483883 | 0.812994 |
| 12               | 6                | 0              | -0.05761                | 1.74934  | 0.110683 |
| 13               | 1                | 0              | -0.59263                | 2.695979 | 0.089735 |
| 14               | 6                | 0              | 1.384047                | 1.66554  | 0.110088 |
| 15               | 6                | 0              | 2.233869                | 2.785824 | 0.172073 |
| 16               | 6                | 0              | 3.176221                | 0.203706 | -0.34455 |
| 17               | 6                | 0              | 3.594758                | 2.588729 | 0.053589 |
| 18               | 1                | 0              | 1.812779                | 3.774741 | 0.315311 |
| 19               | 6                | 0              | 3.646756                | -1.04959 | -0.81591 |
| 20               | 6                | 0              | 4.102871                | 1.300644 | -0.23385 |
| 21               | 1                | 0              | 4.280507                | 3.426766 | 0.134536 |
| 22               | 6                | 0              | 4.990783                | -1.22873 | -1.07129 |
| 23               | 1                | 0              | 2.925221                | -1.8003  | -1.12181 |
| 24               | 6                | 0              | 5.482954                | 1.063142 | -0.47188 |
| 25               | 6                | 0              | 5.922759                | -0.18125 | -0.86094 |
| 26               | 1                | 0              | 5.339208                | -2.17593 | -1.47089 |
| 27               | 1                | 0              | 6.179902                | 1.888831 | -0.36782 |
| 28               | 1                | 0              | 6.976091                | -0.354   | -1.05275 |
| 29               | 7                | 0              | 1.853277                | 0.400553 | -0.05177 |
| 30               | 7                | 0              | -2.90799                | 1.44249  | 0.403666 |
| 31               | 1                | 0              | -1.87089                | -1.84777 | 0.677163 |
| 32               | 26               | 0              | 0.475353                | -0.91925 | 0.375109 |
| 33               | 7                | 0              | -0.69042                | 0.608062 | 0.051899 |
| 34               | 8                | 0              | -1.01151                | -2.05733 | 1.112838 |
| 35               | 1                | 0              | -0.91034                | -3.02223 | 1.139648 |
| 36               | 8                | 0              | 0.614449                | -0.39574 | 2.390773 |
| 37               | 1                | 0              | 0.92487                 | 0.462841 | 2.717628 |
| 38               | 1                | 0              | -0.17004                | -0.6339  | 2.911741 |
| 39               | 8                | 0              | 1.634875                | -2.45562 | 0.987627 |
| 40               | 1                | 0              | 2.510655                | -2.55784 | 0.574844 |
| 41               | 1                | 0              | 1.791403                | -2.43868 | 1.946752 |
| 42               | 8                | 0              | 0.286139                | -1.51757 | -1.27376 |
| 43               | 1                | 0              | 0.351014                | -2.48657 | -1.32608 |
| 44               | 7                | 0              | -2.66958                | -0.58337 | -0.62034 |
| 45               | 1                | 0              | -2.2084                 | -1.04158 | -1.40522 |
| -----            |                  |                |                         |          |          |

Rotational constants (GHZ): 0.490834 0.103481 0.094098

**Figure S8:** Coordinates for optimized geometry of  $L_1$  at B3LYP/6-31G(d,p)

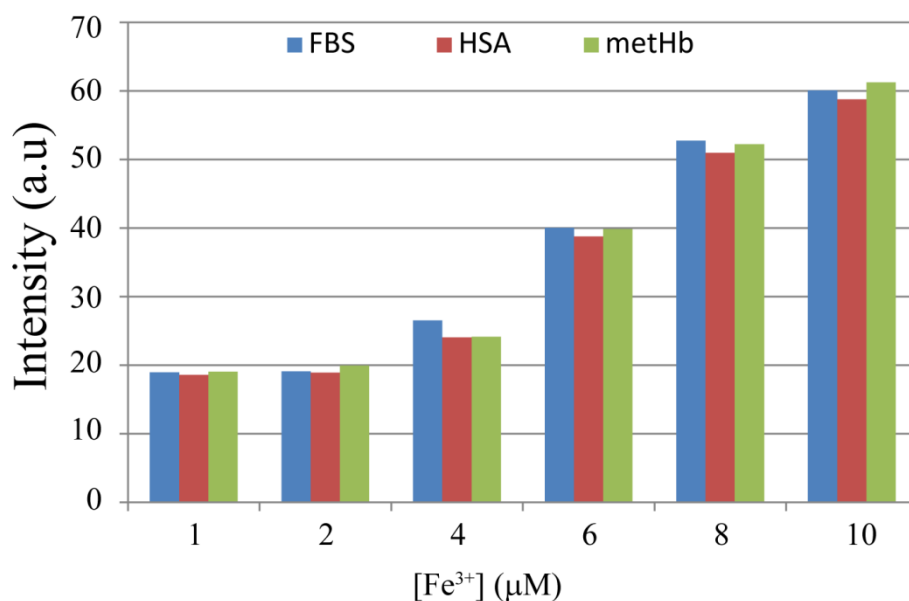

**Figure S9:** fluorescence emission (calculated at  $\lambda_{em}$ ) of  $L_1$  on addition of increasing concentration of  $Fe^{3+}$  in different protein environment.

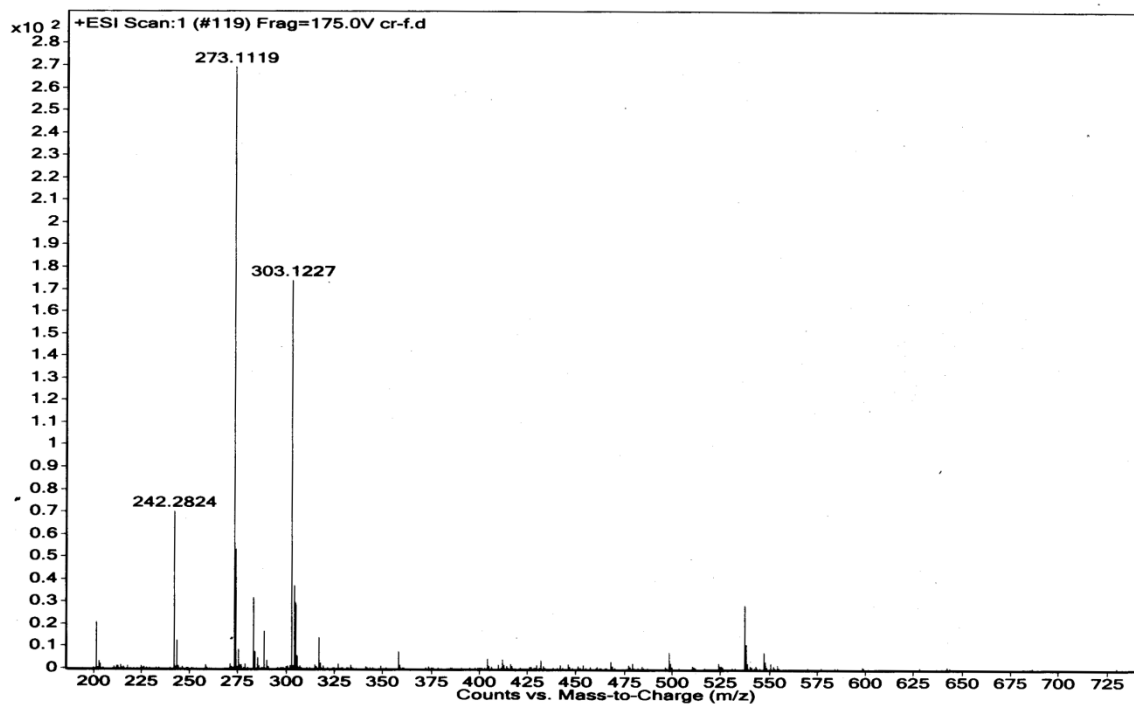

**Figure S10:** Mass spectrum of  $L_1$ -Fe+Fluoride

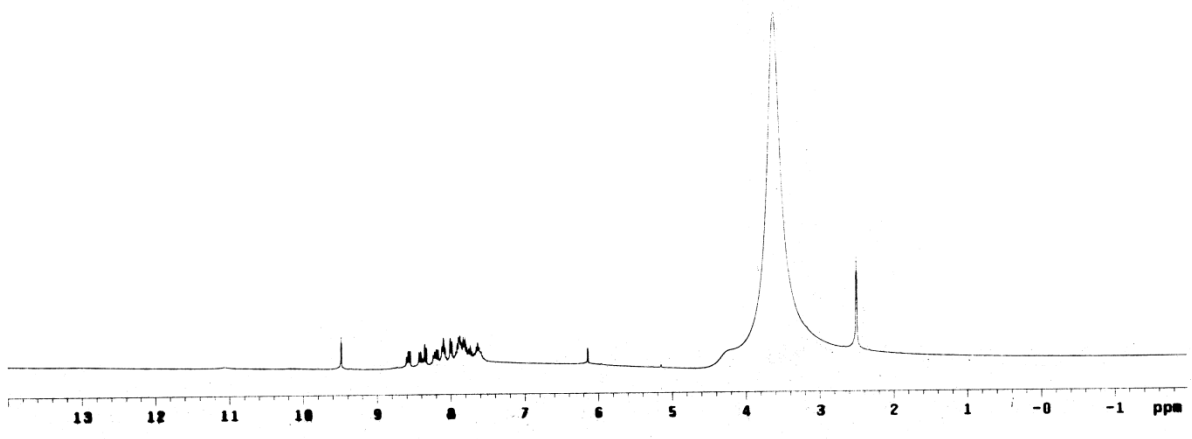

Figure S11:  $^1\text{H}$  NMR spectrum of  $\text{L}_1$  in  $\text{DMSO-d}_6$  solution.

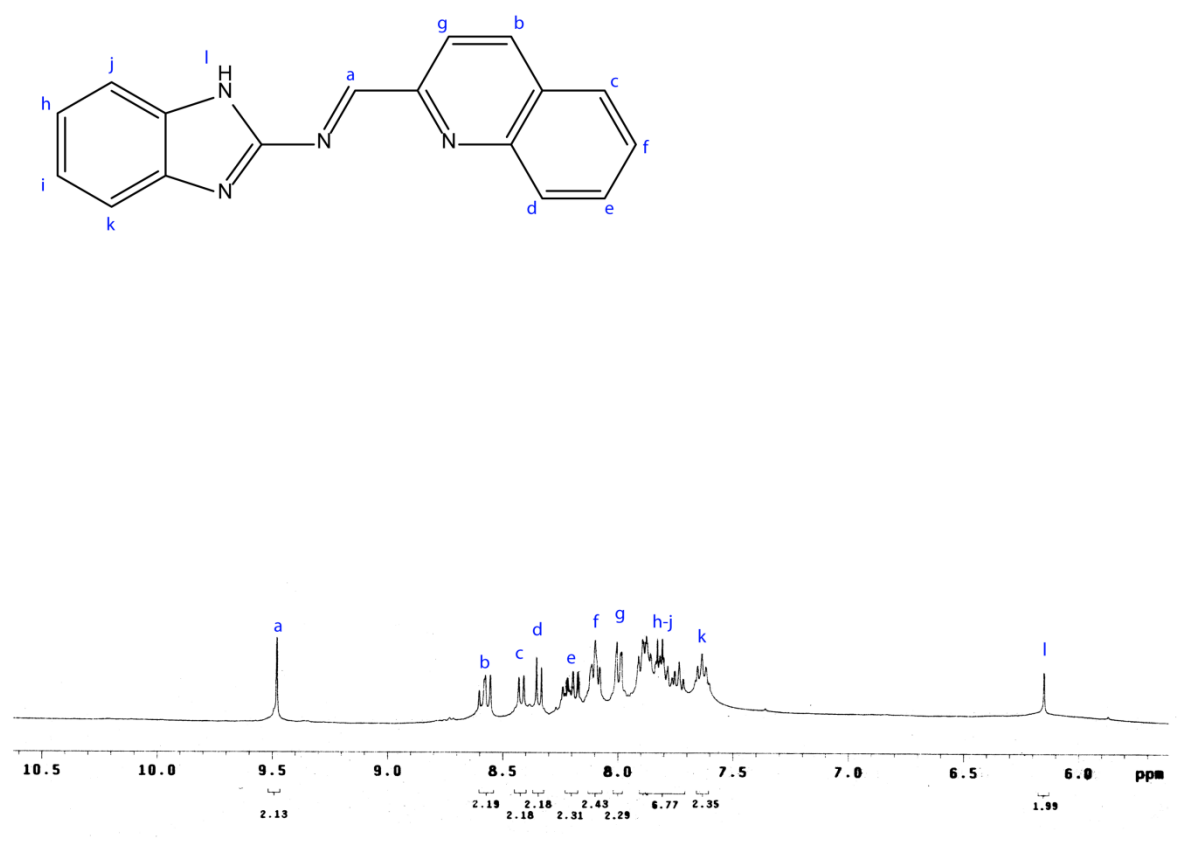

Figure S12:  $^1\text{H}$  NMR spectrum of  $\text{L}_1$  in  $\text{DMSO-d}_6$  solution (expanded aromatic part).



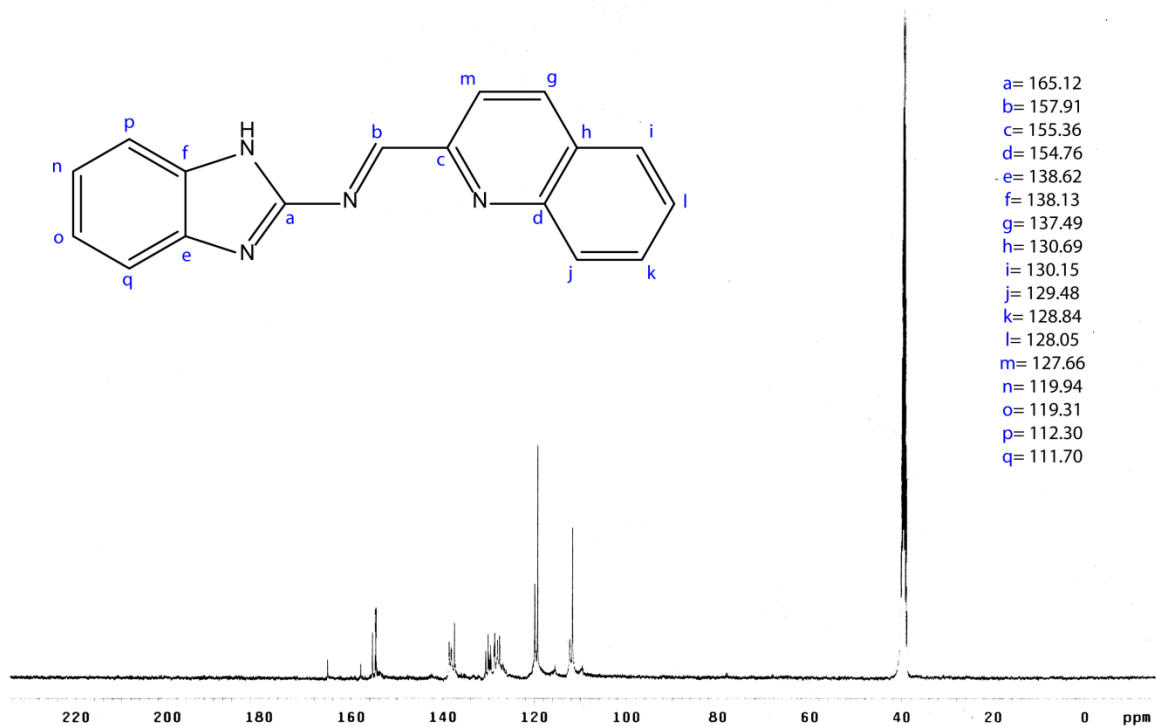

**Figure S13:**  $^{13}\text{C}$  NMR spectrum of  $L_1$  in  $\text{DMSO-d}_6$  solution.

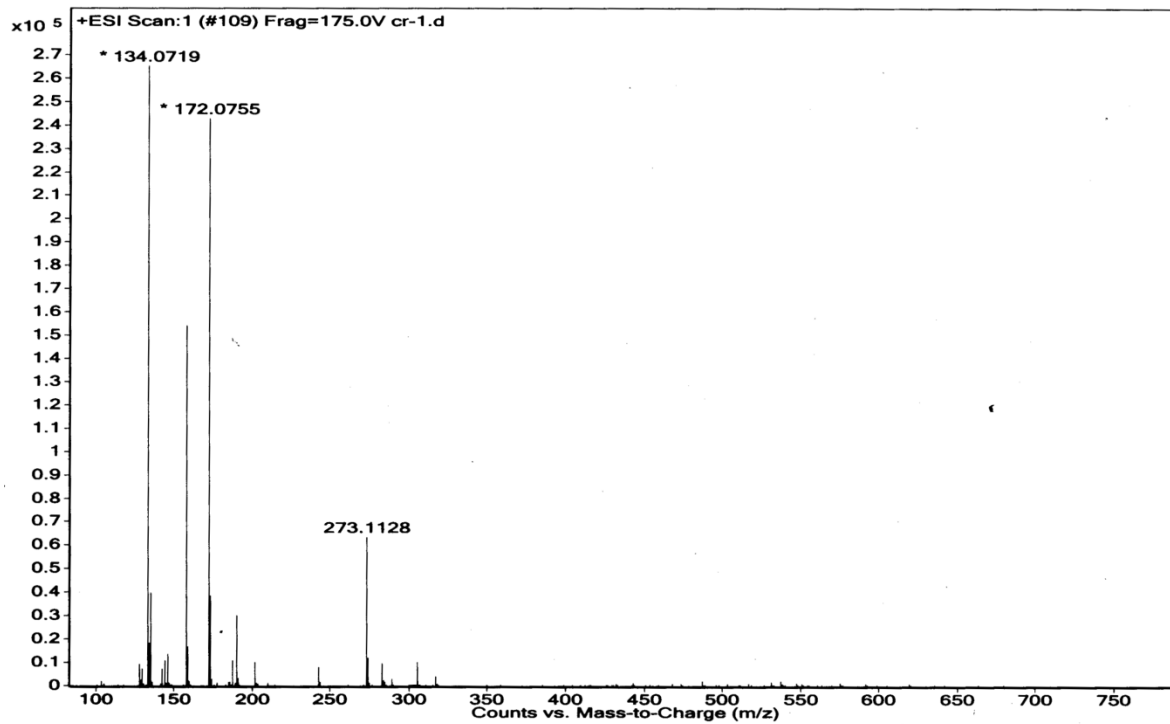

**Figure S14:** Mass spectrum of  $L_1$  (Mass spectrum obtained in positive mode).

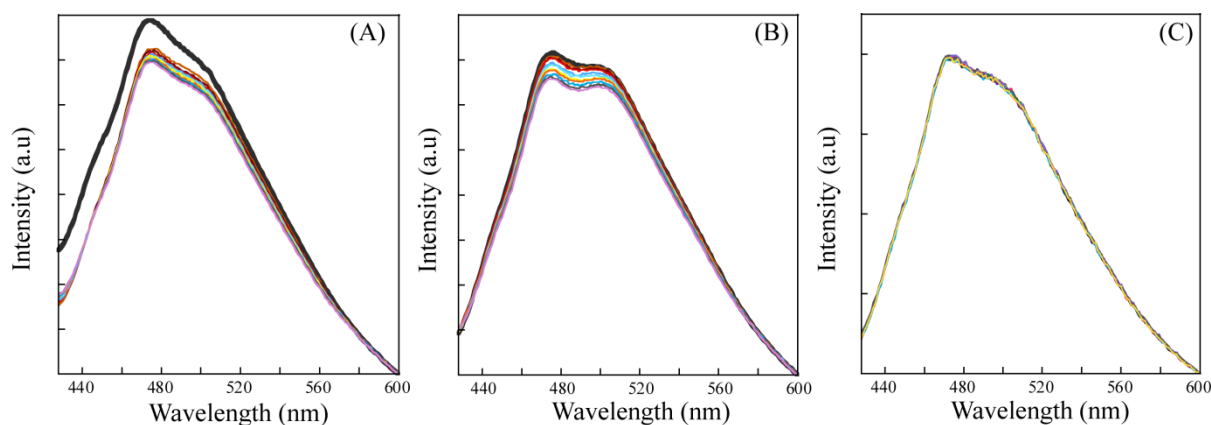

**Figure S15:** Changes in fluorescence intensity of  $L_1$ -Fe complex in present of different amounts of proteins. A) methHb B) FBS C)HAS

### References:

1. Koch, W.; Holthausen, M. C. *A Chemist's Guide to Density Functional Theory. 2nd edition*, Wiley-VCH, New York, **2000**, 1-300.
2. Gaussian 03, Revision E.01, M. J. Frisch, G. W. Trucks, H. B. Schlegel, G. E. Scuseria, M. A. Robb, J. R. Cheeseman, J. A. Montgomery, Jr., T. Vreven, K. N. Kudin, J. C. Burant, J. M. Millam, S. S. Iyengar, J. Tomasi, V. Barone, B. Mennucci, M. Cossi, G. Scalmani, N. Rega, G. A. Petersson, H. Nakatsuji, M. Hada, M. Ehara, K. Toyota, R. Fukuda, J. Hasegawa, M. Ishida, T. Nakajima, Y. Honda, O. Kitao, H. Nakai, M. Klene, X. Li, J. E. Knox, H. P. Hratchian, J. B. Cross, V. Bakken, C. Adamo, J. Jaramillo, R. Gomperts, R. E. Stratmann, O. Yazyev, A. J. Austin, R. Cammi, C. Pomelli, J. W. Ochterski, P. Y. Ayala, K. Morokuma, G. A. Voth, P. Salvador, J. J. Dannenberg, V. G. Zakrzewski, S. Dapprich, A. D. Daniels, M. C. Strain, O. Farkas, D. K. Malick, A. D. Rabuck, K. Raghavachari, J. B. Foresman, J. V. Ortiz, Q. Cui, A. G. Baboul, S. Clifford, J. Cioslowski, B. B. Stefanov, G. Liu, A. Liashenko, P. Piskorz, I. Komaromi, R. L. Martin, D. J. Fox, T. Keith, M. A. Al-Laham, C. Y. Peng, A. Nanayakkara, M. Challacombe, P. M. W. Gill, B. Johnson, W. Chen, M. W. Wong, C. Gonzalez, and J. A. Pople, Gaussian, Inc., Wallingford CT, 2004.
